# Supplementary material
Source: Springer Nature journal article supplement (https://www.springermedizin.de/resource/supplementary/12891_2008_583_MOESM2_ESM.pdf/9506408)
Supplement: MOESM2 [file 9506408]

CUMULATIVE SCORE

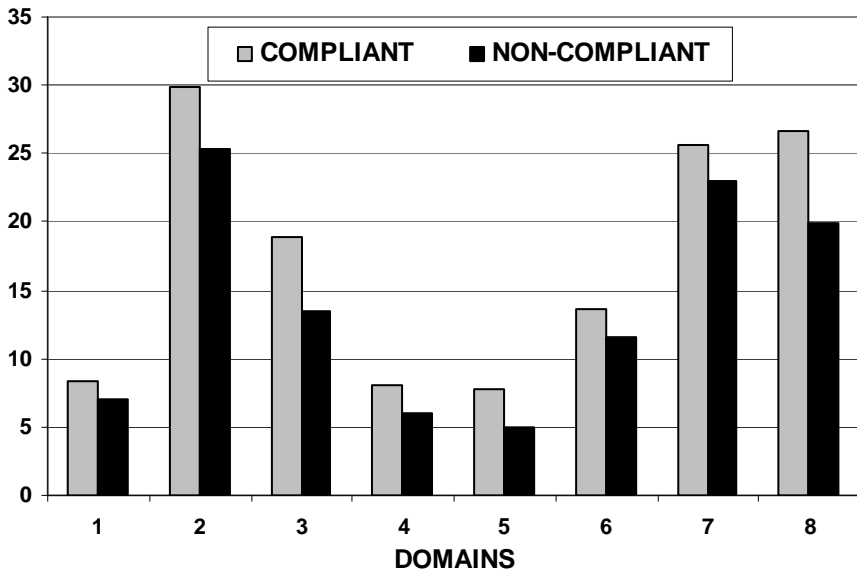

Domains: 1=General health perception; 2=Physical functioning; 3=Emotional functioning; 4=Self esteem and aesthetics; 5=Vitality; 6=School activity; 7=Bodily pain; 8=Social functioning
